# Supplementary material for: Boron-doped graphene as a promising electrocatalyst for NO electrochemical reduction: a computational study
Source: Royal Society of Chemistry journal article supplement (doi:10.1039/c8nj03279c), 2018-01-01
Supplement: c8nj03279c1.pdf [file c8nj03279c1.pdf]

## Supporting Information

### **Boron-Doped Graphene as a Promising Electrocatalyst for NO Electrochemical Reduction: a Computational Study**

Shuang Ji,<sup>†</sup> Jingxiang Zhao,<sup>\*,†,‡</sup>

<sup>†</sup> College of Chemistry and Chemical Engineering, Harbin Normal University, Harbin,  
150025, China

<sup>‡</sup> Key Laboratory of Photonic and Electronic Bandgap Materials, Ministry of  
Education, Harbin Normal University, Harbin, 150025, China

\* To whom correspondence should be addressed. Email: xjz\_hmily@163.com (JZ)

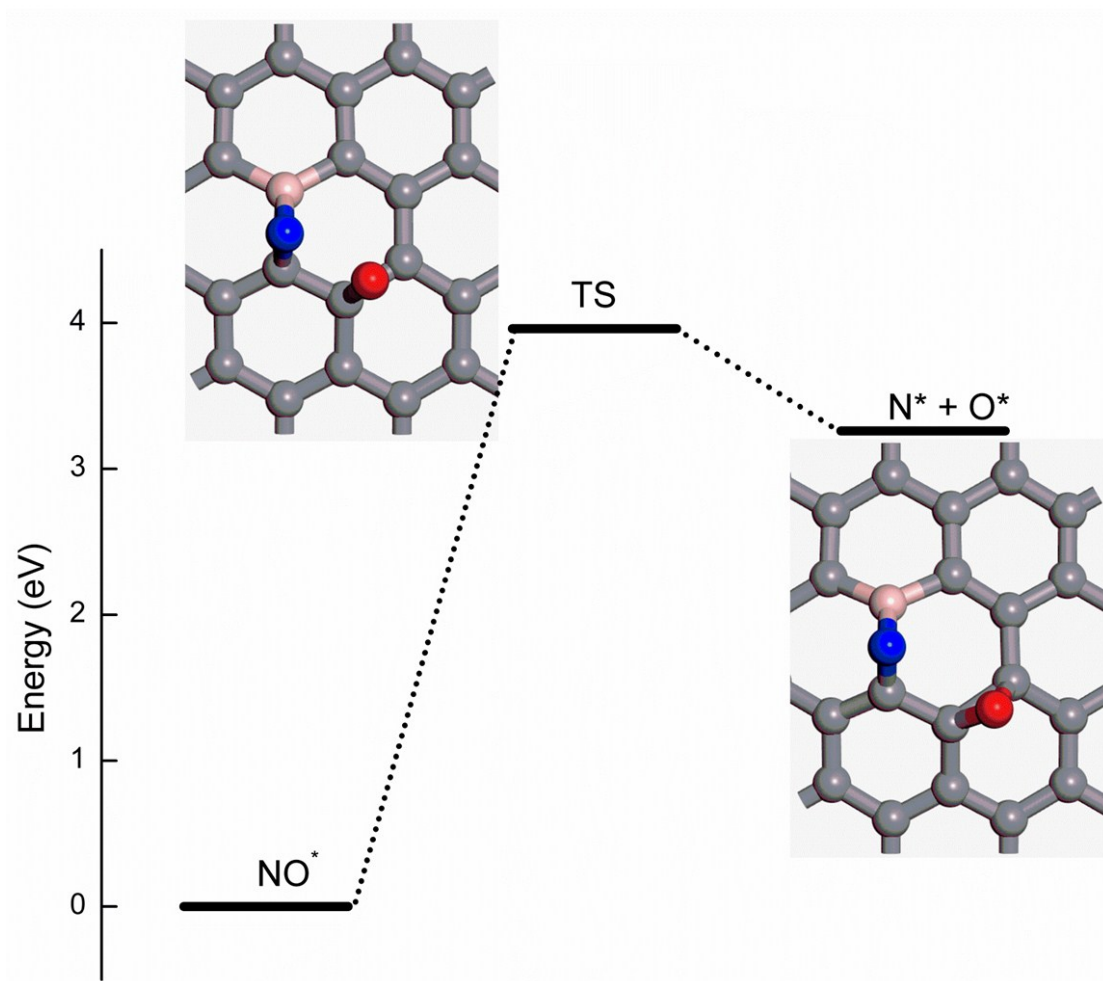

**Fig. S1.** The dissociation pathway of the adsorbed NO species on BG.

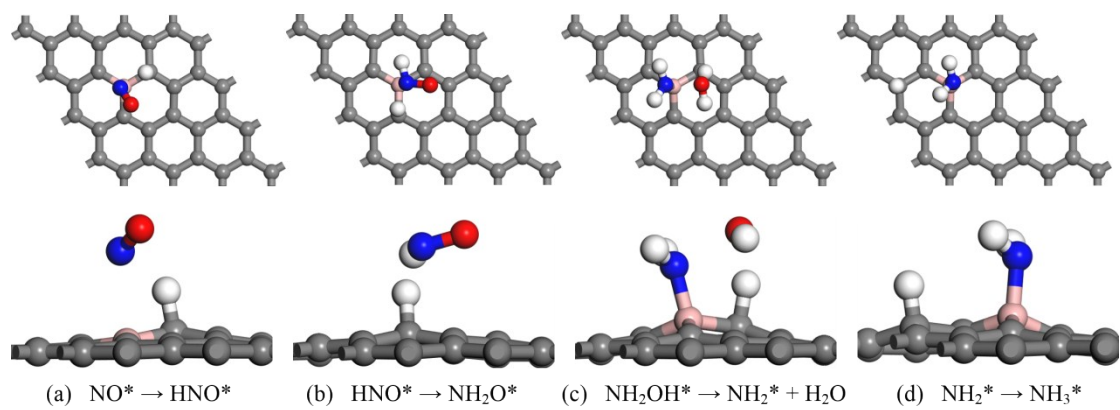

**Fig. S2.** Some key transition states involved into the NOER on BG.

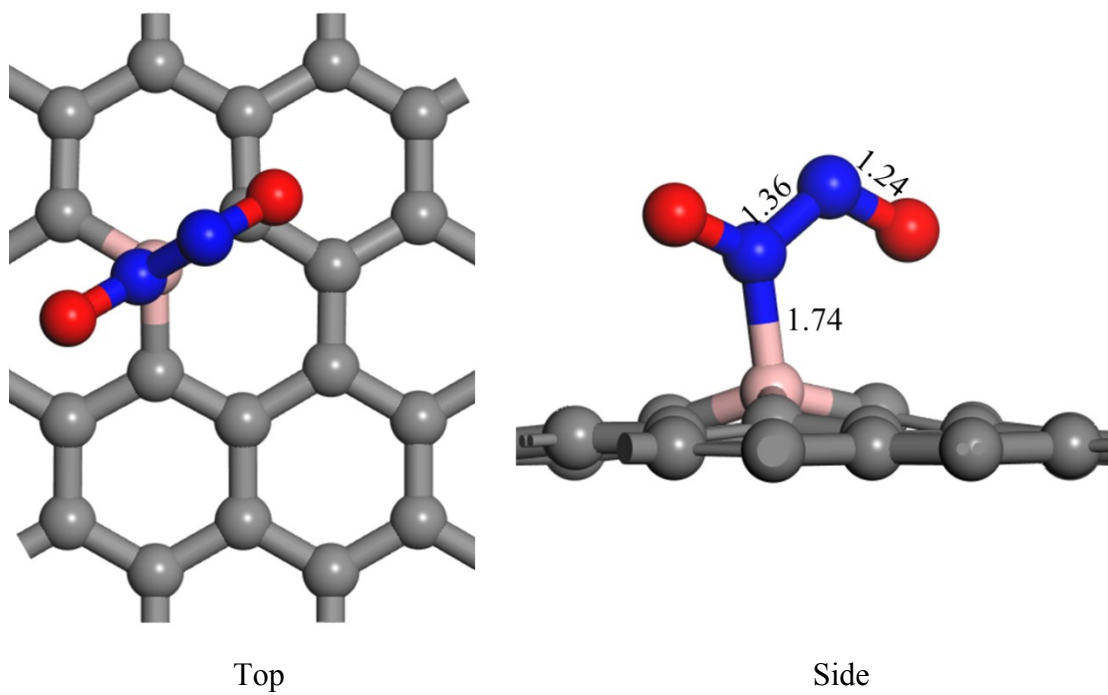

**Fig. S3.** The optimized configurations of NO dimer adsorption on BG.
